# Supplementary material for: Understanding the preparative chemistry of atomically dispersed nickel catalysts for achieving high-efficiency H2O2 electrosynthesis
Source: Royal Society of Chemistry journal article supplement (doi:10.1039/d4sc03105a), 2024-01-01
Supplement: d4sc03105a1.pdf [file d4sc03105a1.pdf]

**Electronic Supplementary Information (ESI)**

**Understanding the preparative chemistry of atomically dispersed nickel catalysts for achieving high-efficiency H<sub>2</sub>O<sub>2</sub> electrosynthesis**

**June Sung Lim,<sup>a</sup> Jinwoo Woo,<sup>b</sup> Geunsu Bae,<sup>c</sup> Suhwan Yoo,<sup>a</sup> Jinjong Kim,<sup>a</sup> Jae Hyung Kim,<sup>d</sup> Jong Hoon Lee,<sup>e</sup> Young Jin Sa,<sup>f</sup> Ji-Wook Jang,<sup>g</sup> Yun Jeong Hwang,<sup>a</sup> Chang Hyuck Choi,<sup>\*ch</sup> and Sang Hoon Joo<sup>\*a</sup>**

*<sup>a</sup>Department of Chemistry, Seoul National University, Seoul 08826, Republic of Korea.*

*<sup>b</sup>Lotte Chemical Institute of Technology (LCIT), Daejeon 34110, Republic of Korea.*

*<sup>c</sup>Department of Chemistry, Pohang University of Science and Technology (POSTECH), Pohang 37673, Republic of Korea.*

*<sup>d</sup>Clean Fuel Research Laboratory, Korea Institute of Energy Research (KIER), Daejeon, 34129, Republic of Korea.*

*<sup>e</sup>UNIST Central Research Facilities, Ulsan National Institute of Science and Technology (UNIST), Ulsan 44919, Republic of Korea.*

*<sup>f</sup>Department of Chemistry, Kwangwoon University, Seoul 01897, Republic of Korea.*

*<sup>g</sup>School of Energy and Chemical Engineering, Ulsan National Institute of Science and Technology (UNIST), Ulsan 44919, Republic of Korea.*

*<sup>h</sup>Institute for Convergence Research and Education in Advanced Technology (I-CREATE), Yonsei University, Seoul 03722, Republic of Korea.*

**Corresponding Author**

\*E-mail: chchoi@postech.ac.kr (C.H.C.), shjoo1@snu.ac.kr (S.H.J.)

## Table of contents

|                                                                                                                                                                                                       |            |
|-------------------------------------------------------------------------------------------------------------------------------------------------------------------------------------------------------|------------|
| <b>1. Supplementary figures and tables</b>                                                                                                                                                            | <b>S3</b>  |
| <b>Fig. S1</b> Structural characterization of SBA-15.                                                                                                                                                 | <b>S3</b>  |
| <b>Fig. S2</b> BR-STEM images of Ni-N/C_3_X catalysts.                                                                                                                                                | <b>S4</b>  |
| <b>Fig. S3</b> N <sub>2</sub> physisorption analyses of Ni-N/C_3_X catalysts.                                                                                                                         | <b>S5</b>  |
| <b>Table S1</b> Textural properties of SBA-15 and Ni-N/C_3_X catalysts.                                                                                                                               | <b>S6</b>  |
| <b>Table S2</b> ICP-OES and EA results of Ni-N/C_3_X catalysts.                                                                                                                                       | <b>S7</b>  |
| <b>Fig. S4</b> HPR polarization curves of Ni-N/C_3_X catalysts.                                                                                                                                       | <b>S8</b>  |
| <b>Fig. S5</b> High-magnification BR-STEM image of Ni-N/C_3_Dry catalyst.                                                                                                                             | <b>S9</b>  |
| <b>Fig. S6</b> Nyquist plots of Ni-N/C_3_X catalysts.                                                                                                                                                 | <b>S10</b> |
| <b>Fig. S7</b> BR-STEM images of Ni-N/C_Y_H <sub>2</sub> O Catalysts.                                                                                                                                 | <b>S11</b> |
| <b>Fig. S8</b> Nyquist plots of Ni-N/C_Y_H <sub>2</sub> O catalysts.                                                                                                                                  | <b>S12</b> |
| <b>Fig. S9</b> N <sub>2</sub> physisorption analyses of Ni-N/C_Y_H <sub>2</sub> O catalysts.                                                                                                          | <b>S13</b> |
| <b>Table S3</b> Textural properties of SBA-15 and Ni-N/C_Y_H <sub>2</sub> O catalysts.                                                                                                                | <b>S14</b> |
| <b>Table S4</b> ICP-OES and EA results of Ni-N/C_Y_H <sub>2</sub> O catalysts.                                                                                                                        | <b>S15</b> |
| <b>Fig. S10</b> Ni 2p XPS spectra of Ni-N/C_2_H <sub>2</sub> O and Ni-N/C_3_H <sub>2</sub> O catalysts.                                                                                               | <b>S16</b> |
| <b>Fig. S11</b> N 1s XPS spectra of Ni-N/C_2_H <sub>2</sub> O and Ni-N/C_3_H <sub>2</sub> O catalysts.                                                                                                | <b>S17</b> |
| <b>Fig. S12</b> EXAFS fitting spectra of Ni-N/C_2_H <sub>2</sub> O and Ni-N/C_3_H <sub>2</sub> O catalysts.                                                                                           | <b>S18</b> |
| <b>Fig. S13</b> Model structure for EXAFS fitting of Ni-N/C_2_H <sub>2</sub> O and Ni-N/C_3_H <sub>2</sub> O catalysts.                                                                               | <b>S19</b> |
| <b>Table S5</b> EXAFS fitting parameters of Ni-N/C_2_H <sub>2</sub> O catalyst and Ni-N/C_3_H <sub>2</sub> O catalyst, and Ni foil.                                                                   | <b>S20</b> |
| <b>Fig. S14</b> HPR polarization curves of Ni-N/C_Y_H <sub>2</sub> O catalysts.                                                                                                                       | <b>S21</b> |
| <b>Table S6</b> H <sub>2</sub> O <sub>2</sub> production performance comparison between Ni-N/C_3_H <sub>2</sub> O catalyst and previously reported nonprecious metal ADCs and carbon-based catalysts. | <b>S22</b> |
| <b>Fig. S15</b> FT-IR spectrum of Ni-N/C_3_H <sub>2</sub> O catalyst.                                                                                                                                 | <b>S23</b> |
| <b>Fig. S16</b> In-situ ATR-SEIRAS spectra of Ni-N/C_3_H <sub>2</sub> O catalyst in Ar-saturated 0.1 M KOH.                                                                                           | <b>S24</b> |
| <b>Fig. S17</b> CV curve of Ni Ni-N/C_3_H <sub>2</sub> O catalyst in Ar-saturated 0.1 M KOH.                                                                                                          | <b>S25</b> |
| <b>Fig. S18</b> ORR polarization curves of Ni-N/C_3_H <sub>2</sub> O catalyst before and after CN <sup>-</sup> poisoning.                                                                             | <b>S26</b> |
| <b>Fig. S19</b> The non-faradaic current, HPR current, and H <sub>2</sub> O <sub>2</sub> production current responses of eight-day-tested Ni-N/C_3_H <sub>2</sub> O-coated electrode.                 | <b>S27</b> |
| <b>Fig. S20</b> EXAFS fitting spectra of Ni foil in <i>R</i> space.                                                                                                                                   | <b>S28</b> |
| <b>Fig. S21</b> Collection efficiency of Ni-N/C_3_X and Ni-N/C_Y_H <sub>2</sub> O catalysts in 0.1 M KOH.                                                                                             | <b>S29</b> |
| <b>2. References</b>                                                                                                                                                                                  | <b>S30</b> |

## 1. Supplementary figures and tables

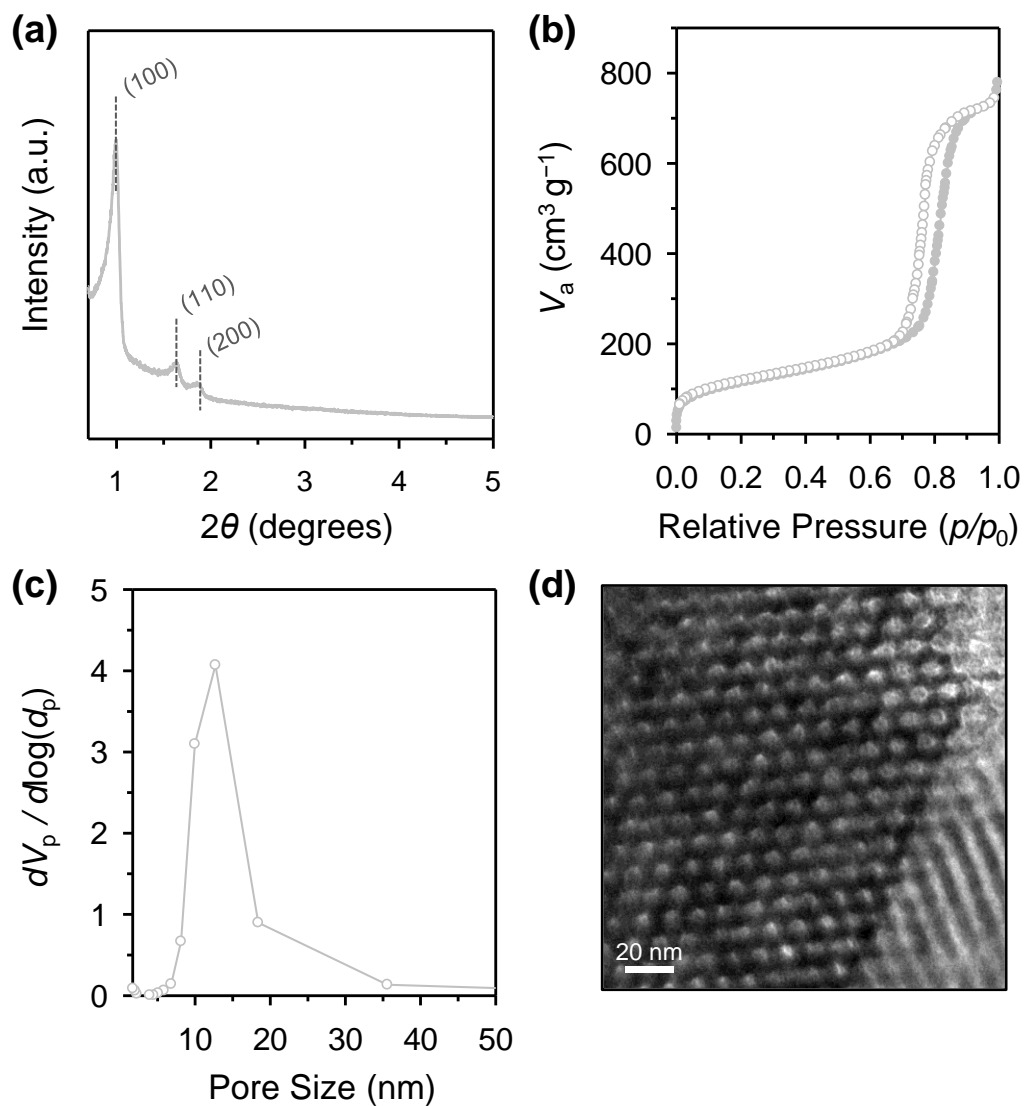

**Fig. S1** (a) Small-angle XRD pattern, (b)  $N_2$  adsorption-desorption isotherm, (c) BJH pore size distribution curve obtained from the adsorption branch of the corresponding isotherm, and (d) BF-STEM image of SBA-15.

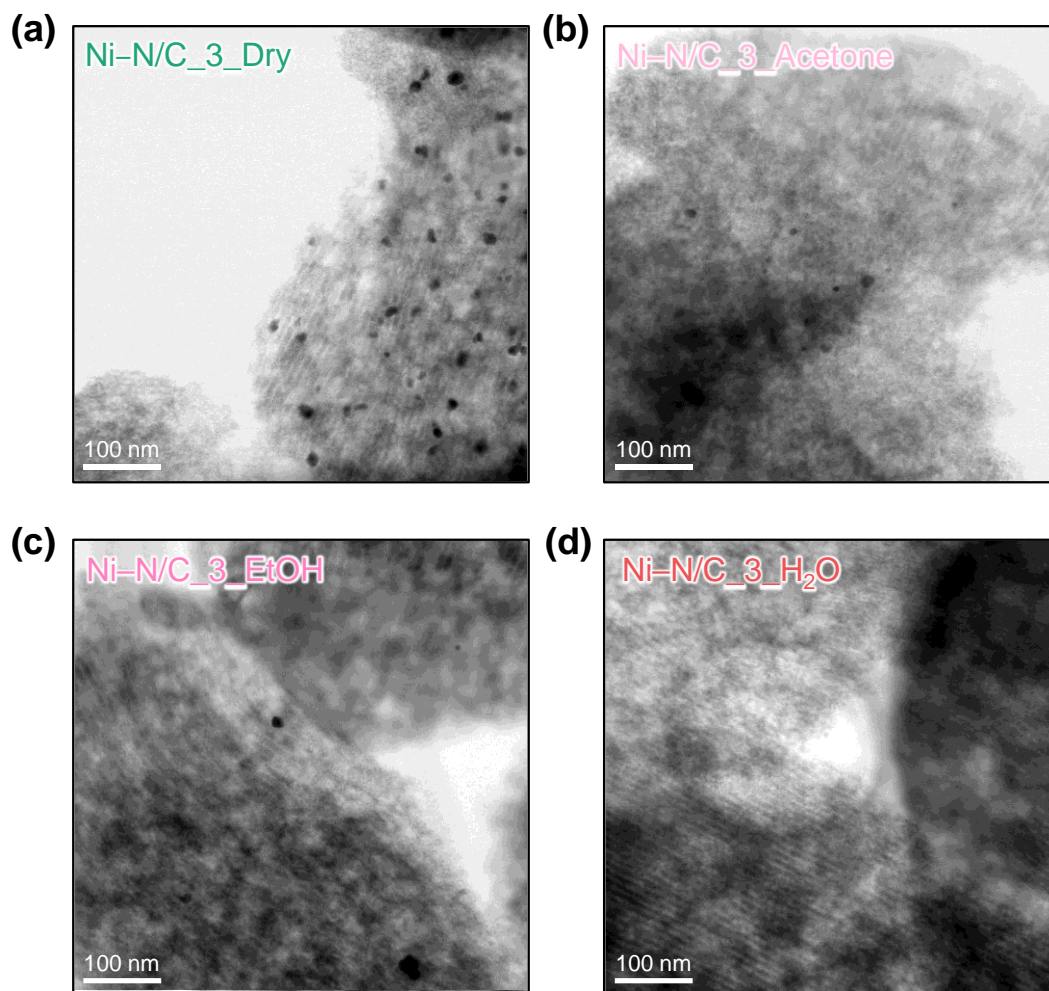

**Fig. S2** BR-STEM images of (a) Ni-N/C\_3\_Dry, (b) Ni-N/C\_3\_Acetone, (c) Ni-N/C\_3\_EtOH, and (d) Ni-N/C\_3\_H<sub>2</sub>O catalysts.

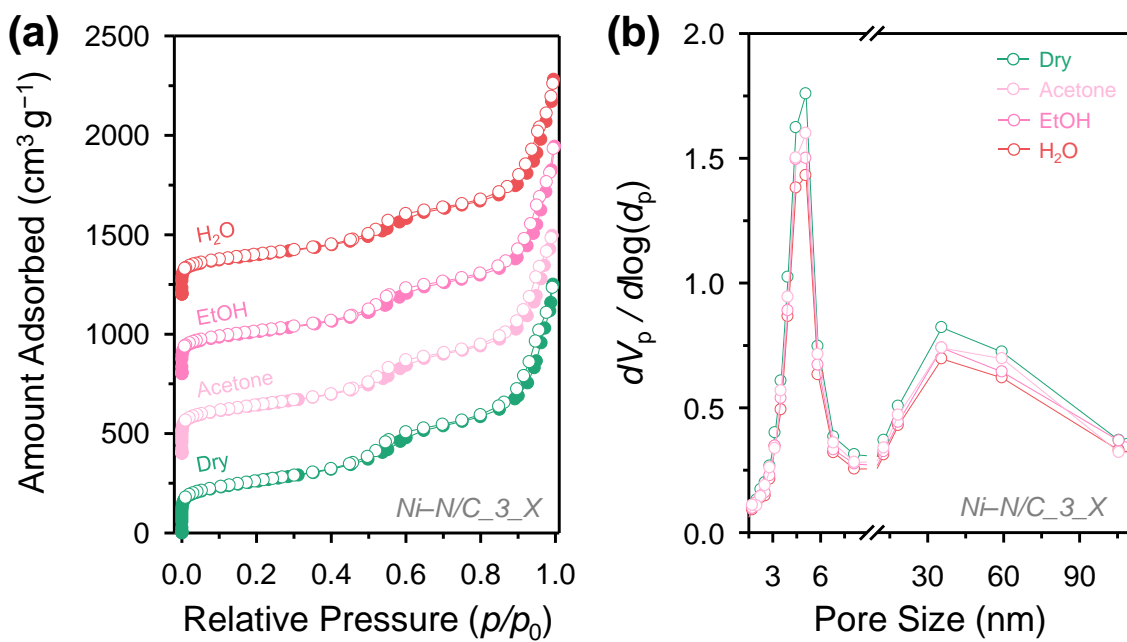

**Fig. S3** (a) N<sub>2</sub> adsorption-desorption isotherms and (b) BJH pore size distribution curves obtained from the adsorption branch of the corresponding isotherms of Ni-N/C<sub>3</sub>X catalysts. The isotherms of Ni-N/C<sub>3</sub>\_Acetone, Ni-N/C<sub>3</sub>\_EtOH, and Ni-N/C<sub>3</sub>\_H<sub>2</sub>O were offset by 400, 800, and 1200 cm<sup>3</sup> g<sup>-1</sup>, respectively, for clarity.

**Table S1** Textural properties of SBA-15 and the Ni-N/C\_3\_X catalysts

| Material                  | Mean pore diameter <sup>a</sup><br>(nm) | BET surface area <sup>b</sup><br>(m <sup>2</sup> g <sup>-1</sup> ) | Total pore volume <sup>c</sup><br>(cm <sup>3</sup> g <sup>-1</sup> ) |
|---------------------------|-----------------------------------------|--------------------------------------------------------------------|----------------------------------------------------------------------|
| SBA-15                    | 12.7                                    | 408                                                                | 1.18                                                                 |
| Ni-N/C_3_Dry              | 5.1                                     | 739                                                                | 1.21                                                                 |
| Ni-N/C_3_Acetone          | 5.1                                     | 719                                                                | 1.13                                                                 |
| Ni-N/C_3_EtOH             | 5.1                                     | 710                                                                | 1.16                                                                 |
| Ni-N/C_3_H <sub>2</sub> O | 5.1                                     | 730                                                                | 1.10                                                                 |

<sup>a</sup> Determined at the maximum point in the pore size distribution curve. <sup>b</sup> Calculated in the relative pressure range of 0.05–0.2. <sup>c</sup> Calculated at the relative pressure of 0.98–0.99.

**Table S2** ICP–OES and EA results of Ni–N/C\_3\_X catalysts in wt%

| Material                  | Ni <sup>a</sup> | C <sup>b</sup> | H <sup>b</sup> | N <sup>b</sup> | O <sup>b</sup> |
|---------------------------|-----------------|----------------|----------------|----------------|----------------|
| Ni–N/C_3_Dry              | 1.68            | 77.09          | 1.75           | 9.58           | 9.86           |
| Ni–N/C_3_Acetone          | 1.62            | 76.83          | 2.03           | 9.15           | 9.64           |
| Ni–N/C_3_EtOH             | 1.53            | 76.27          | 1.94           | 9.43           | 9.28           |
| Ni–N/C_3_H <sub>2</sub> O | 1.73            | 75.81          | 1.88           | 10.39          | 9.54           |

<sup>a</sup> Determined by ICP-OES analysis. <sup>b</sup> Determined by EA.

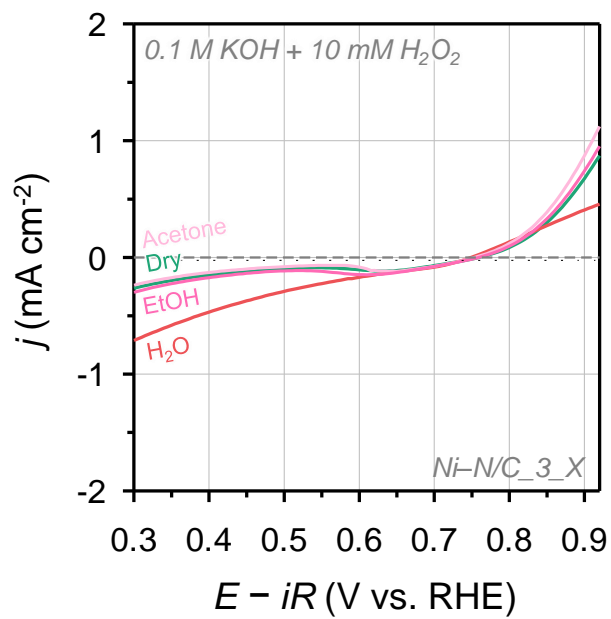

**Fig. S4** HPR polarization curves of Ni-N/C<sub>3</sub>X catalysts measured in N<sub>2</sub>-saturated 0.1 M KOH containing 10 mM H<sub>2</sub>O<sub>2</sub>.



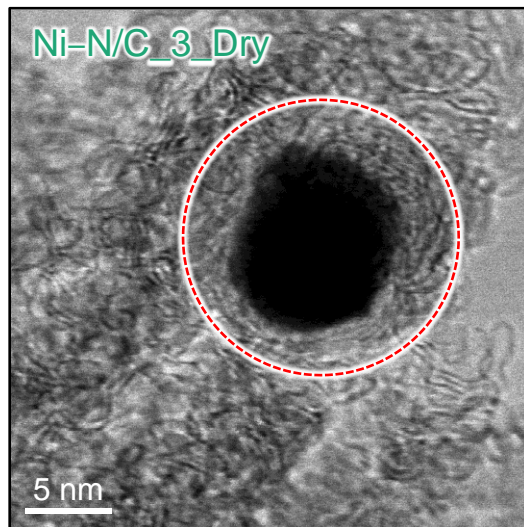

**Fig. S5** High-magnification BR-STEM image of Ni-N/C\_3\_Dry catalyst.

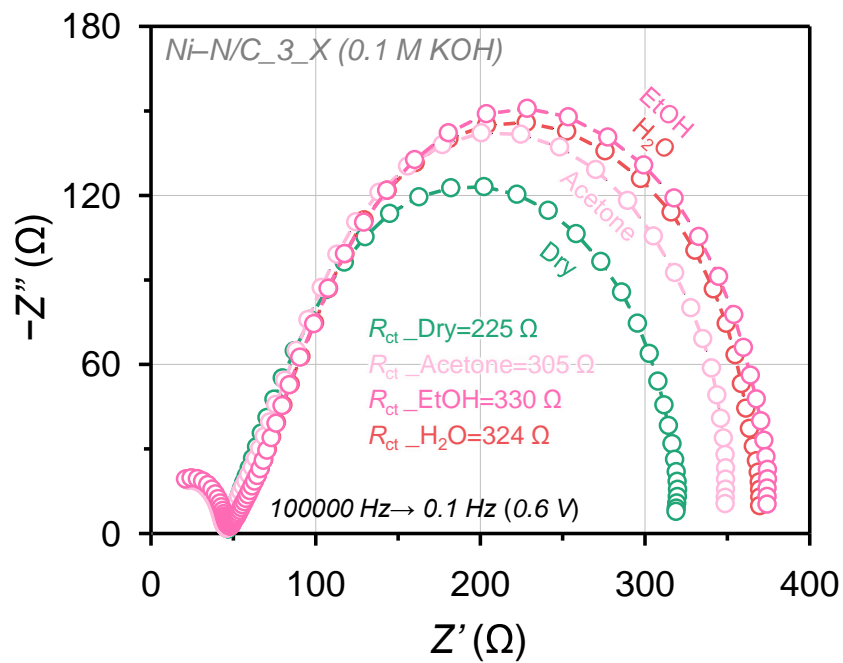

**Fig. S6** Nyquist plots of Ni-N/C\_3\_X catalysts.

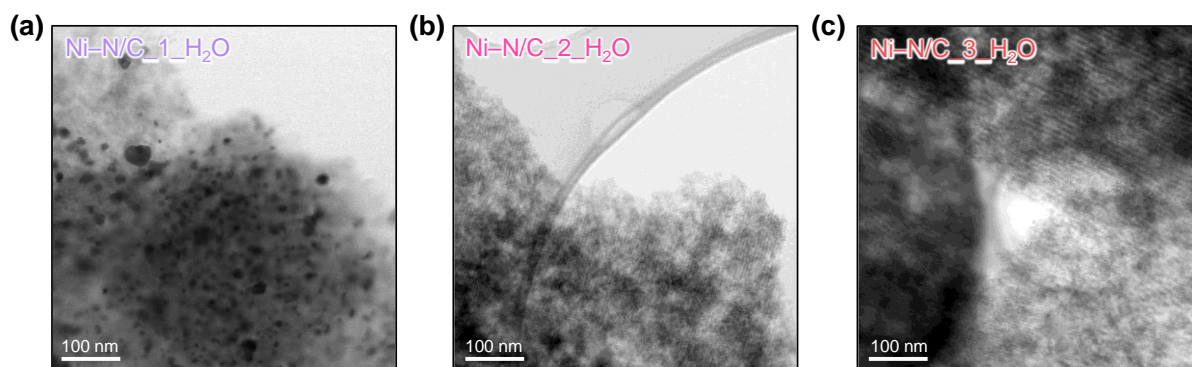

**Fig. S7** BR-STEM images of (a) Ni-N/C\_1\_H<sub>2</sub>O, (b) Ni-N/C\_2\_H<sub>2</sub>O, and (c) Ni-N/C\_3\_H<sub>2</sub>O catalysts.

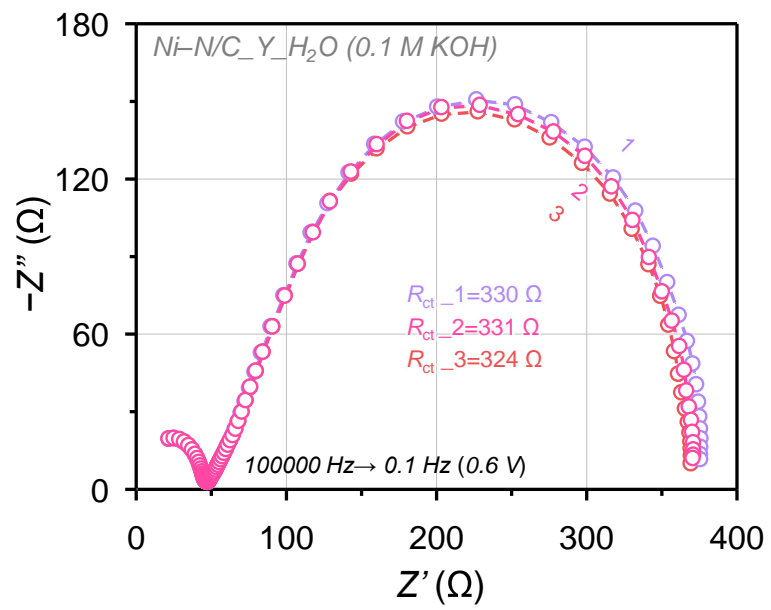

**Fig. S8** Nyquist plots of Ni-N/C\_Y\_H<sub>2</sub>O catalysts.

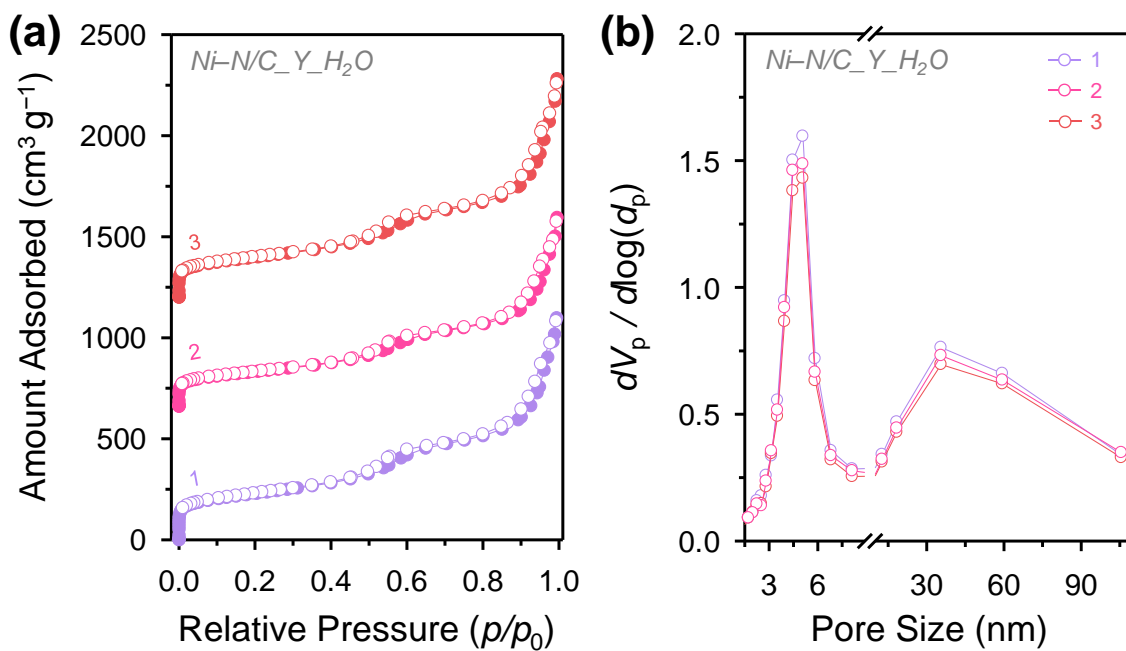

**Fig. S9** (a) N<sub>2</sub> adsorption-desorption isotherms and (b) BJH pore size distribution curves obtained from the adsorption branch of the corresponding isotherms of Ni-N/C\_Y\_H<sub>2</sub>O catalysts. The isotherms of Ni-N/C\_2\_H<sub>2</sub>O and Ni-N/C\_3\_H<sub>2</sub>O were offset by 600 and 1200 cm<sup>3</sup> g<sup>-1</sup>, respectively, for clarity.

**Table S3** Textural properties of SBA-15 and Ni-N/C\_Y\_H<sub>2</sub>O catalysts

| Material                  | Mean pore diameter <sup>a</sup><br>(nm) | BET surface area <sup>b</sup><br>(m <sup>2</sup> g <sup>-1</sup> ) | Total pore volume <sup>c</sup><br>(cm <sup>3</sup> g <sup>-1</sup> ) |
|---------------------------|-----------------------------------------|--------------------------------------------------------------------|----------------------------------------------------------------------|
| SBA-15                    | 12.7                                    | 408                                                                | 1.18                                                                 |
| Ni-N/C_1_H <sub>2</sub> O | 5.1                                     | 741                                                                | 1.17                                                                 |
| Ni-N/C_2_H <sub>2</sub> O | 5.1                                     | 773                                                                | 1.11                                                                 |
| Ni-N/C_3_H <sub>2</sub> O | 5.1                                     | 730                                                                | 1.10                                                                 |

<sup>a</sup> Determined at the maximum point in the pore size distribution curve. <sup>b</sup> Calculated in the relative pressure range of 0.05–0.2. <sup>c</sup> Calculated at the relative pressure of 0.98–0.99.

**Table S4** ICP-OES and EA results of Ni-N/C\_Y\_H<sub>2</sub>O catalysts in wt%

| Material                  | Ni <sup>a</sup> | C <sup>b</sup> | H <sup>b</sup> | N <sup>b</sup> | O <sup>b</sup> |
|---------------------------|-----------------|----------------|----------------|----------------|----------------|
| Ni-N/C_1_H <sub>2</sub> O | 1.68            | 76.68          | 2.07           | 8.13           | 10.08          |
| Ni-N/C_2_H <sub>2</sub> O | 1.53            | 76.95          | 1.93           | 8.77           | 9.42           |
| Ni-N/C_3_H <sub>2</sub> O | 1.73            | 75.81          | 1.88           | 10.39          | 9.54           |

<sup>a</sup> Determined by ICP-OES analysis. <sup>b</sup> Determined by EA.

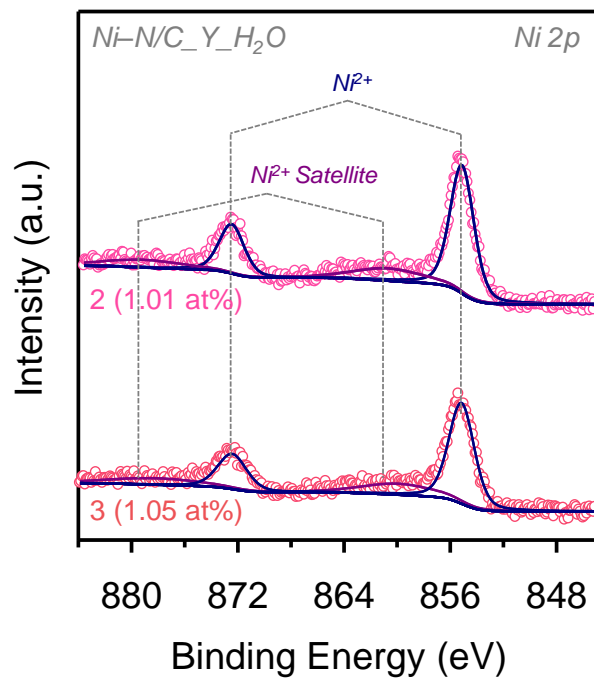

**Fig. S10** Ni 2p XPS spectra of Ni-N/C\_2\_H2O and Ni-N/C\_3\_H2O catalysts.



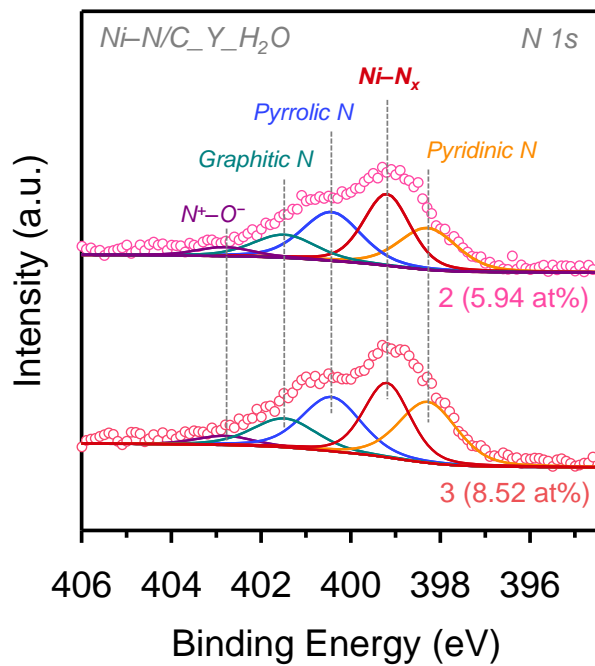

**Fig. S11** N 1s XPS spectra of Ni-N/C\_2\_H<sub>2</sub>O and Ni-N/C\_3\_H<sub>2</sub>O catalysts.

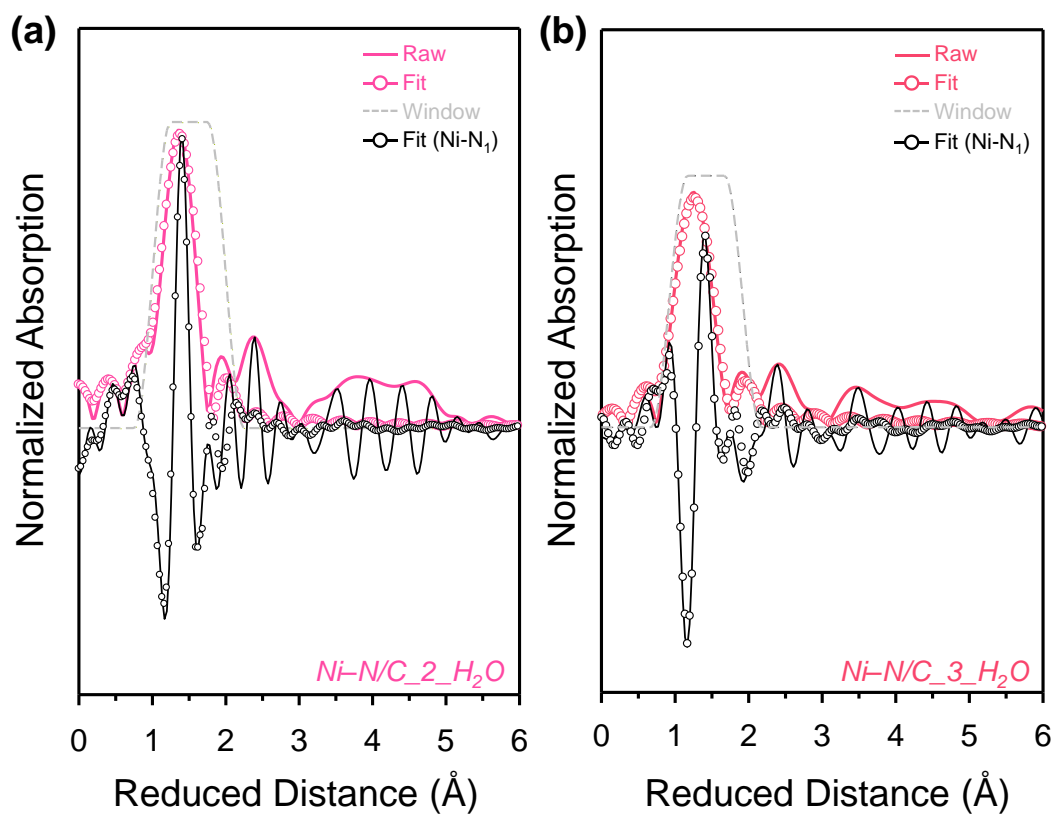

**Fig. S12** EXAFS fitting spectra of the (a) Ni-N/C<sub>2</sub>-H<sub>2</sub>O and (b) Ni-N/C<sub>3</sub>-H<sub>2</sub>O catalysts in  $R$  space.

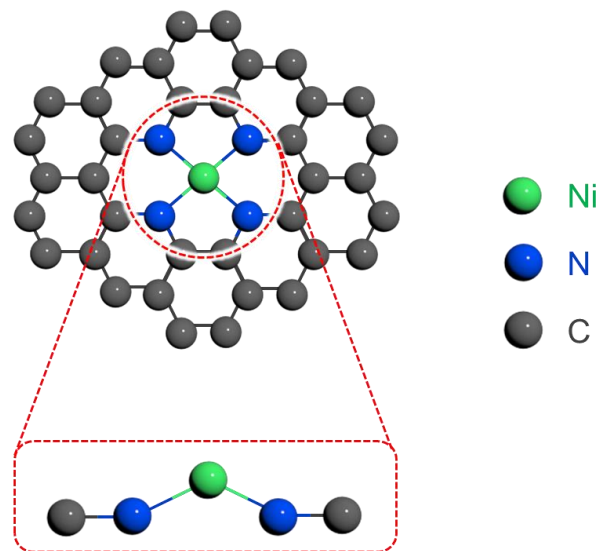

**Fig. S13** Model structure for EXAFS fitting of the Ni-N/C<sub>2</sub>-H<sub>2</sub>O and Ni-N/C<sub>3</sub>-H<sub>2</sub>O catalysts.

**Table S5** Summary of EXAFS fitting parameters for Ni–N/C\_2\_H<sub>2</sub>O, Ni–N/C\_3\_H<sub>2</sub>O, and Ni foil

| Material                  | $k$ range<br>( $\text{\AA}^{-1}$ ) | $R$ range<br>( $\text{\AA}$ ) | Scattering                          | CN <sup>a</sup>  | $R^b$<br>( $\text{\AA}$ ) | $\sigma^2^c$<br>( $10^{-3}\text{\AA}^{-2}$ ) | $\Delta E_0$<br>(eV) | $R$ factor<br>(%) |
|---------------------------|------------------------------------|-------------------------------|-------------------------------------|------------------|---------------------------|----------------------------------------------|----------------------|-------------------|
| Ni–N/C_2_H <sub>2</sub> O | 2.5–<br>11.7                       | 1.0–2.0                       | Ni–N <sub>1</sub>                   | 4.1<br>$\pm 0.3$ | 1.88<br>$\pm 0.02$        | 8.3<br>$\pm 3.6$                             | 4.5<br>$\pm 2.7$     | 1.6               |
| Ni–N/C_3_H <sub>2</sub> O | 2.5–<br>11.7                       | 1.0–2.0                       | Ni–N <sub>1</sub>                   | 3.9<br>$\pm 0.2$ | 1.82<br>$\pm 0.04$        | 7.7<br>$\pm 2.5$                             | 7.9<br>$\pm 1.1$     | 0.9               |
| Ni Foil                   | 2.5–<br>12.5                       | 1.7–4.25                      | Ni–Ni <sub>1</sub>                  | 12               | 2.492<br>$\pm 0.01$       | 8.2<br>$\pm 1.5$                             | 5.9<br>$\pm 1.1$     | 1.1               |
|                           |                                    |                               | Ni–Ni <sub>2</sub>                  | 6                | 3.524<br>$\pm 0.01$       |                                              |                      |                   |
|                           |                                    |                               | Ni–Ni <sub>3</sub>                  | 24               | 4.317<br>$\pm 0.01$       |                                              |                      |                   |
|                           |                                    |                               | Ni–Ni <sub>1</sub> –Ni <sub>1</sub> | 48               | 3.739<br>$\pm 0.01$       |                                              |                      |                   |
|                           |                                    |                               | Ni–Ni <sub>1</sub> –Ni <sub>2</sub> | 48               | 4.255<br>$\pm 0.01$       |                                              |                      |                   |

<sup>a</sup>Coordination number. <sup>b</sup>Interatomic distance. <sup>c</sup>Debye–Waller factor. <sup>d</sup>All Ni foil CN values were fixed to a theoretical values for *fcc* Ni to obtain the passive electron reduction factor ( $S_0^2$ ) which was determined to be 0.87.

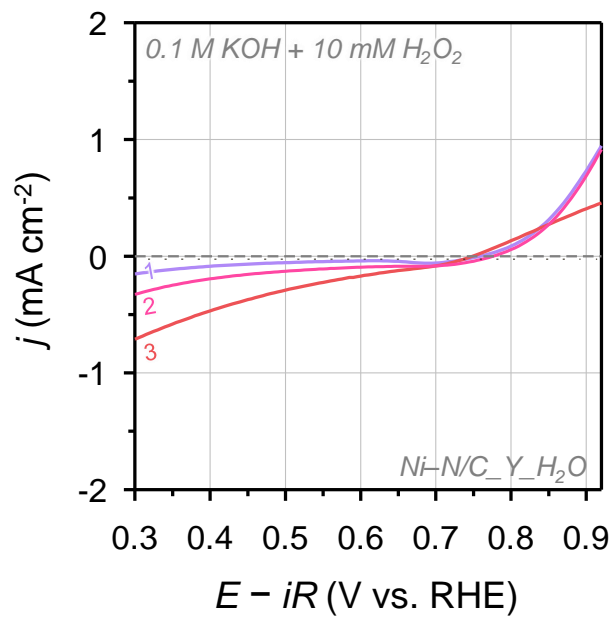

**Fig. S14** HPR polarization curves of Ni-N/C\_Y\_H<sub>2</sub>O catalysts measured in N<sub>2</sub>-saturated 0.1 M KOH containing 10 mM H<sub>2</sub>O<sub>2</sub>.

**Table S6** Benchmarking electrochemical H<sub>2</sub>O<sub>2</sub> production performance of Ni–N/C\_3\_H<sub>2</sub>O catalyst with those of previously reported nonprecious metal ADCs and carbon-based catalysts in terms of mass activity and maximum H<sub>2</sub>O<sub>2</sub> selectivity in 0.1 M KOH (or NaOH)

| Sample                                  | Mass activity @<br>0.70 V (A g <sup>-1</sup> ) | Max. H <sub>2</sub> O <sub>2</sub> selectivity<br>by RRDE (%) | References       |
|-----------------------------------------|------------------------------------------------|---------------------------------------------------------------|------------------|
| <b>Ni–N/C_3_H<sub>2</sub>O</b>          | <b>490.9</b>                                   | <b>92</b>                                                     | <b>This work</b> |
| Co-N/C                                  | 35.7                                           | 65                                                            | S1               |
| Fe-CNT                                  | 25.1                                           | 95                                                            | S2               |
| Co <sub>1</sub> -NG(O)                  | 392.9                                          | 80                                                            | S3               |
| Ni SA/G-O                               | 9.9                                            | 94                                                            | S4               |
| O-C (Al)                                | 270.4                                          | 95                                                            | S5               |
| Mo <sub>1</sub> /OSG-H                  | 34.0                                           | 95                                                            | S6               |
| <i>meso</i> -Ni–N/C                     | 61.4                                           | 82                                                            | S7               |
| F-mrGO(600)                             | 110.8                                          | 100                                                           | S8               |
| O-CNT                                   | 29.9                                           | 90                                                            | S9               |
| BN-C1                                   | 8.9                                            | 90                                                            | S10              |
| NCMK3IL                                 | 19.1                                           | 86                                                            | S11              |
| MesoC                                   | 1.3                                            | 80                                                            | S12              |
| o-GOMC-1                                | 73.1                                           | 93                                                            | S13              |
| Oxo-G/NH <sub>3</sub> ·H <sub>2</sub> O | 1.9                                            | 82                                                            | S14              |
| N-MFLG-8                                | 3.0                                            | 95                                                            | S15              |
| GNP <sub>C=O,1</sub>                    | 38.9                                           | 98                                                            | S16              |
| NF-Cs                                   | 24.0                                           | 82                                                            | S17              |
| OCB-120+CTAB                            | 30.2                                           | 92                                                            | S18              |
| OCNS <sub>900</sub>                     | 191.0                                          | 90                                                            | S19              |
| HCB+0.5 KCl                             | 201.3                                          | 87                                                            | S20              |
| O-GOMC-5.5                              | 120.6                                          | 92                                                            | S21              |
| B-C                                     | 32.3                                           | 90                                                            | S22              |

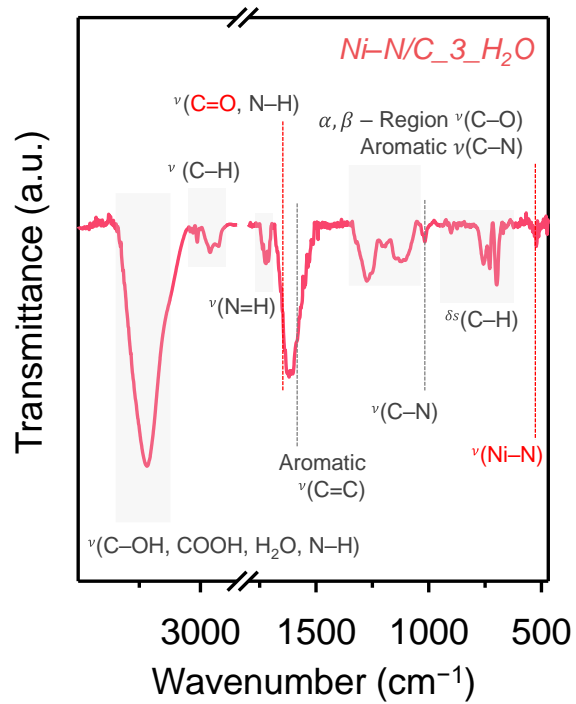

**Fig. S15** FT-IR spectrum of Ni-N/C<sub>3</sub>H<sub>2</sub>O catalyst.

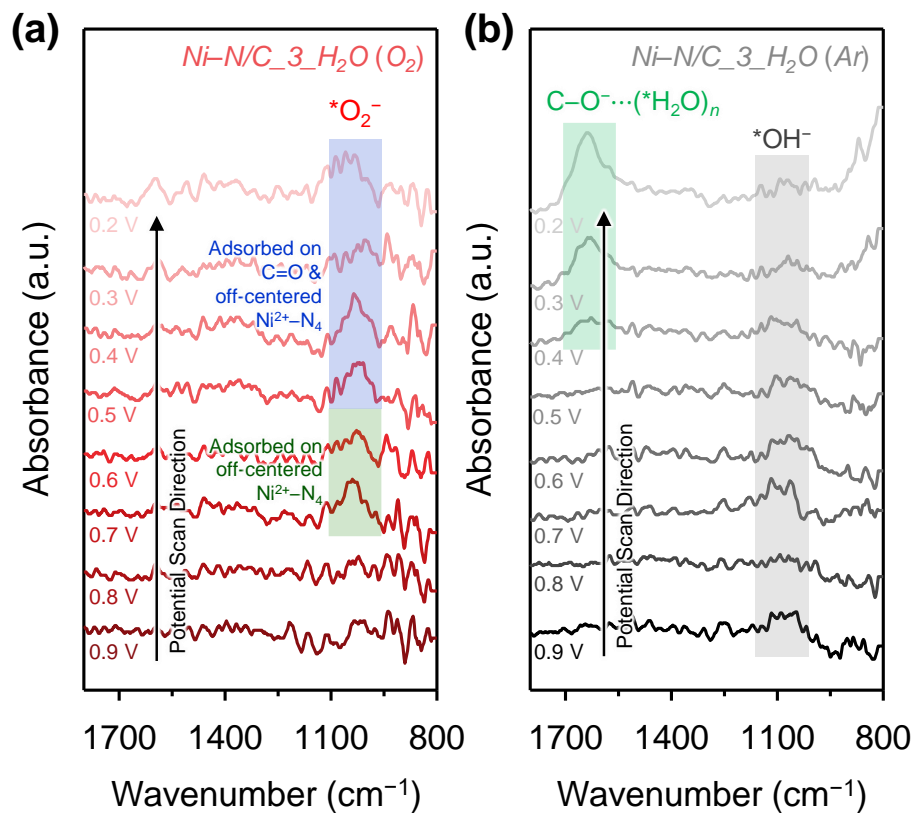

**Fig. S16** In-situ ATR-SEIRAS spectra of Ni-N/C<sub>3</sub>H<sub>2</sub>O catalyst collected in the (a) O<sub>2</sub>-saturated and (b) Ar-saturated 0.1 M KOH electrolyte with 0.1 V intervals from 0.9 V to 0.2 V. The \* symbol denotes catalyst surface.



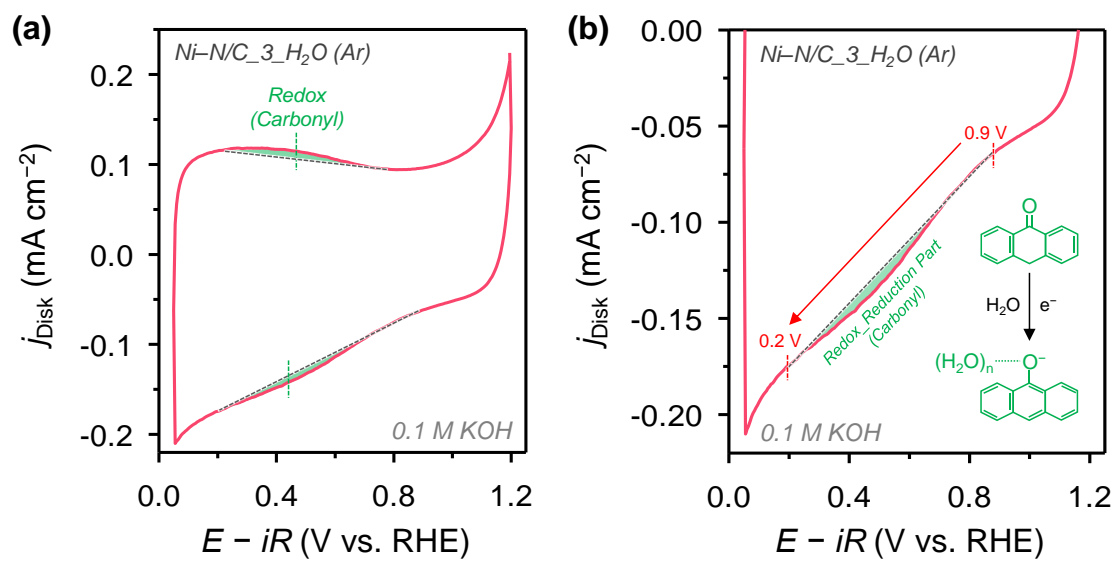

**Fig. S17** (a) Full and (b) carbonyl reduction part enlarged CV curves of Ni-N/C<sub>3</sub>H<sub>2</sub>O catalyst collected in Ar-saturated 0.1 M KOH at a scan rate of 20 mV s<sup>-1</sup>.

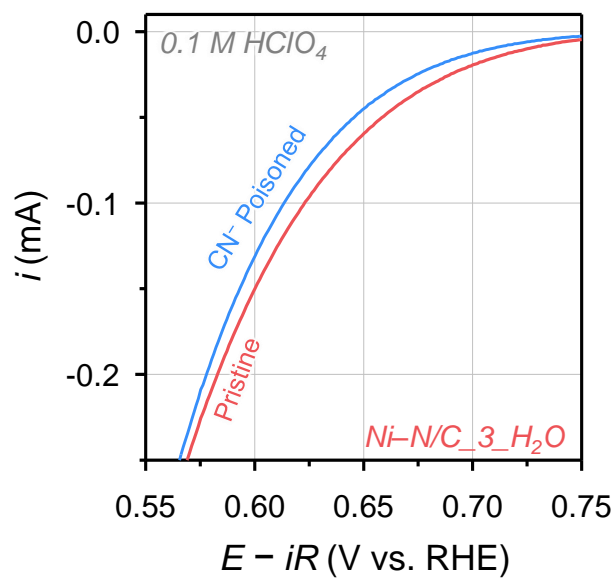

**Fig. S18** ORR polarization curves of Ni-N/C<sub>3</sub>H<sub>2</sub>O catalyst before and after CN<sup>-</sup> poisoning.

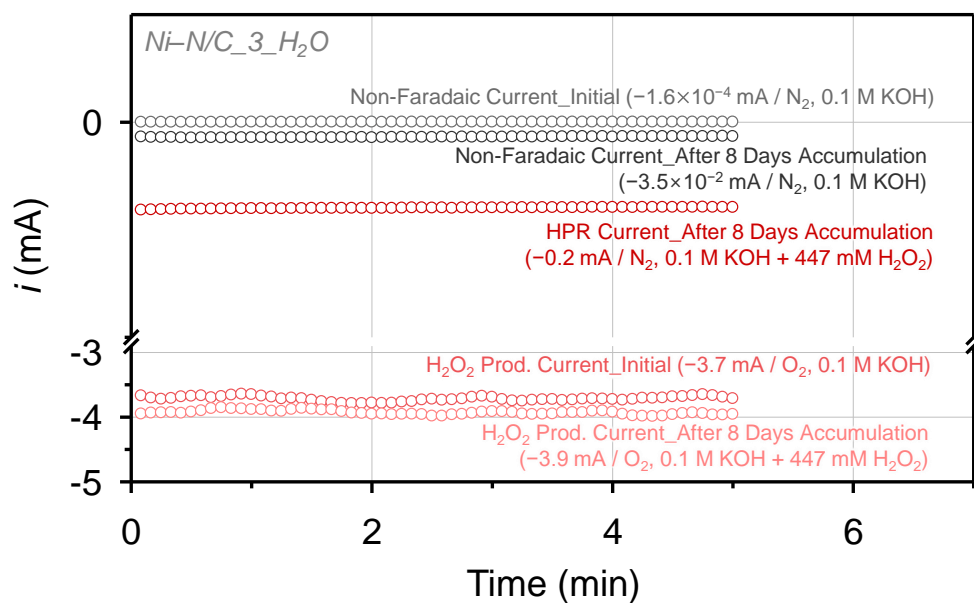

**Fig. S19** The non-faradaic current, HPR current, and H<sub>2</sub>O<sub>2</sub> production current responses of the eight-day-tested Ni–N/C<sub>3</sub>H<sub>2</sub>O-coated electrode at 0.6 V (vs. RHE). The non-faradaic current and H<sub>2</sub>O<sub>2</sub> production current responses of the fresh Ni–N/C<sub>3</sub>H<sub>2</sub>O-coated electrode at 0.6 V (vs. RHE) were used as references.

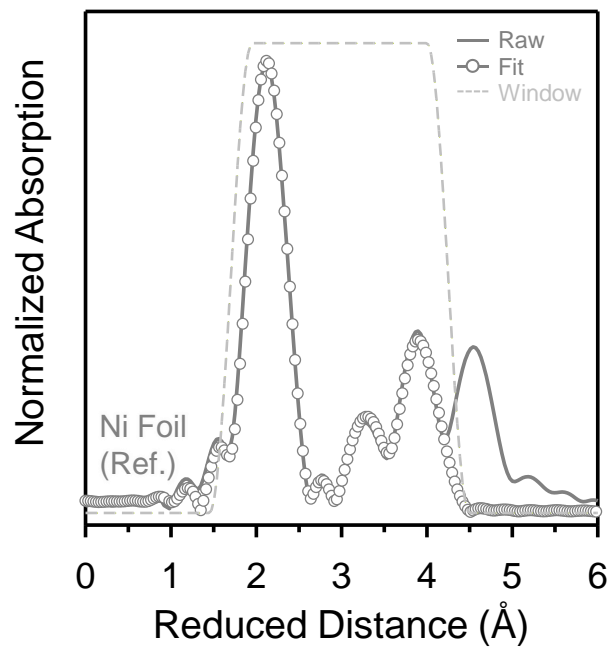

**Fig. S20** EXAFS fitting spectra of Ni foil in the  $R$  space.

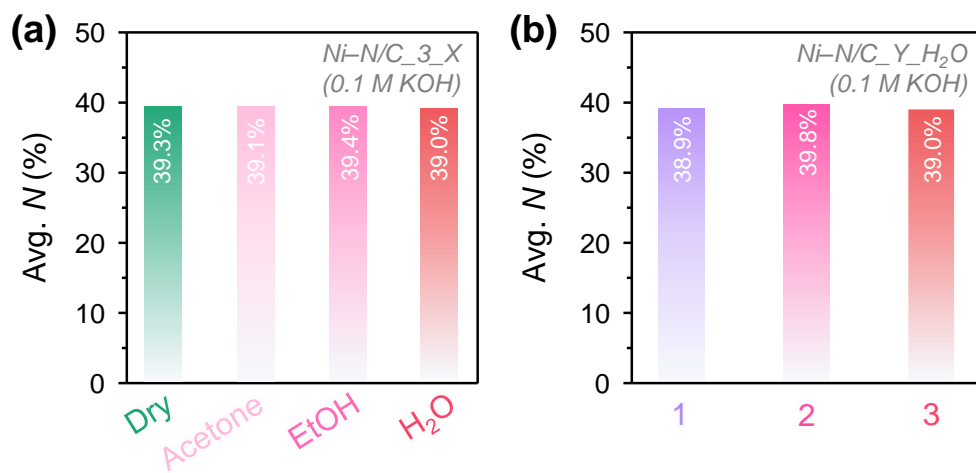

**Fig. S21** Collection efficiency of (a) Ni-N/C\_3\_X and (b) Ni-N/C\_Y\_H2O catalysts in 0.1 M KOH.

## 2. References

- S1 Y. Sun, I. L. Silvioli, N. R. Sahraie, W. Ju, J. Li, A. Zitolo, S. Li, A. Bagger, L. Arnarson, X. Wang, T. Moeller, D. Bernsmeier, J. Rossmeisl, F. Jaouen and P. Strasser, *J. Am. Chem. Soc.*, 2019, **141**, 12372–12381.
- S2 K. Jiang, S. Baek, A. J. Akey, C. Xia, Y. Hu, W. Liang, D. Schaak, E. Stabitski, J. K. Nørskov, S. Siahrostami and H. Wang, *Nat. Commun.*, 2019, **10**, 3997.
- S3 E. Jung, H. Shin, B.-H. Lee, V. Efremov, S. Lee, H. S. Lee, J. Kim, W. H. Antink, S. Park, K.-S. Lee, S.-P. Cho, J. S. Yoo, Y.-E. Sung and T. Hyeon, *Nat. Mater.*, 2020, **19**, 436–442.
- S4 X. Song, N. Li, H. Zhang, L. Wang, Y. Yan, H. Wang, L. Wang and Z. Bian, *ACS Appl. Mater. Interfaces.*, 2020, **12**, 17519–17527.
- S5 Q. Yang, W. Xu, S. Gong, G. Zheng, Z. Tian, Y. Wen, L. Peng, L. Zhang, Z. Lu and L. Chen, *Nat. Commun.*, 2020, **11**, 5478.
- S6 C. Tang, Y. Jiao, B. Shi, J.-N. Liu, Z. Xie, X. Chen, Q. Zhang and S.-Z. Qiao, *Angew. Chem., Int. Ed.*, 2020, **59**, 9171–9176.
- S7 J. S. Lim, J. Kim, K.-S. Lee, Y. J. Sa, S. H. Joo, *Electrochim. Acta*, 2023, **444**, 142031.
- S8 H. W. Kim, M. B. Ross, N. Kornienko, L. Zhang, J. Guo, P. Yang and B. D. McCloskey, *Nat. Catal.*, 2018, **1**, 282–290.
- S9 Lu, Z., G. Chen, S. Siahrostami, Z. Chen, K. Liu, L. Liao, T. Wu, D. Lin, Y. Liu, T. F. Jaramillo, J. K. Nørskov and Y. Cui, *Nat. Catal.*, 2018, **1**, 156–162.
- S10 S. Chen, Z. Chen, S. Siahrostami, D. Higgins, D. Nordlund, D. Sokaras, T. R. Kim, Y. Liu, X. Yan, E. Nilsson, R. Sinclair, J. K. Nørskov, T. F. Jaramillo and Z. Bao, *J. Am. Chem. Soc.*, 2018, **140**, 7851–7859.
- S11 Y. Sun, I. Sinev, W. Ju, A. Bergmann, S. Drespe, S. Kuhl, C. Spöri, H. Schmies, H. Wang, D. Bernsmeier, B. Paul, R. Schmack, R. Kaehnert, B. Roldan Cuenya and P. Strasser, *ACS Catal.*, 2018, **8**, 2844–2856.
- S12 S. Chen, Z. Chen, S. Siahrostami, T. R. Kim, D. Nordlund, D. Sokaras, S. Nowak, J. W. F. To, R. Sinclair, J. K. Nørskov, T. F. Jaramillo and Z. Bao, *ACS Sustainable Chem. Eng.*, 2018, **6**, 311–317.
- S13 Y. J. Sa, J. H. Kim and S. H. Joo, *Angew. Chem., Int. Ed.*, 2019, **58**, 1100–1105.
- S14 L. Han, Y. Sun., S. Li, C. Cheng, C. E. Halbig, P. Feicht, J. L. Hübner, P. Strasser and S. Eigler, *ACS Catal.*, 2019, **9**, 1283–1288.
- S15 L. Li, C. Tang, Y. Zheng, B. Xia, X. Zhou, H. Xu and S.-Z. Qiao, *Adv. Energy Mater.*, 2020, **10**, 2000789.
- S16 G.-F. Han, F. Li, W. Zou, M. Karamad, J.-P. Jeon, S.-W. Kim, S.-J. Kim, Y. Bu, Z. Fu, Y. Liu, S. Siahrostami and J.-B. Baek, *Nat. Commun.*, 2020, **11**, 2209.
- S17 W. Wang, X. Lu, P. Su, Y. Li, J. Cai, Q. Zhang, M. Zhou and O. Arotiba, *Chemosphere*, 2020, **259**, 127423.
- S18 K.-H. Wu, D. Wang, X. Lu, X. Zhang, Z. Xie, Y. Liu, B.-J. Su, J.-M. Chen, D.-S. Su, W. Qi and S. Guo, *Chem*, 2020, **6**, 1443–1458.

- S19 S. Chen, T. Luo, K. Chen, Y. Lin, J. Fu, K. Liu, C. Cai, Q. Wang, H. Li, X. Li, J. Hu, H. Li, M. Zhu and M. Li, *Angew. Chem., Int. Ed.*, 2021, **60**, 16607–16614.
- S20 J. Lee, J. S. Lim, G. Yim, H. Jang, S. H. Joo and Y. J. Sa, *ACS Appl. Mater. Interfaces.*, 2021, **13**, 59904–59914.
- S21 J. S. Lim, J. H. Kim, D. S. Baek, K. Ihm, T. J. Shin, Y. J. Sa and S. H. Joo, *Chem*, 2021, **19**, 436–442.
- S22 Y. Xia, X. Zhao, C. Xia, Z.-Y. Wu, P. Zhu, J. Y. Kim, X. Bai, G. Gao, Y. Hu, J. Zhong, Y. Liu and H. Wang, *Nat. Commun.*, 2021, **12**, 4225.
